1 **Evaluating the tea bag method as a potential tool for detecting the effects of added**  
2 **nutrients and their interactions with climate on litter decomposition**

3  
4 Taiki Mori <sup>a, §, \*</sup>, Toru Hashimoto <sup>b, §</sup>, Yoshimi Sakai <sup>a</sup>

5  
6 <sup>a</sup> Kyushu Research Center, Forestry and Forest Products Research Institute, FFPRI,  
7 Kurokami 4-11-16, Kumamoto 860-0862, Japan

8 <sup>b</sup> Hokkaido Research Center, Forestry and Forest Products Research Institute, FFPRI, 7  
9 Hitsujigaoka, Toyohira, Sapporo, Hokkaido, 062-8516, Japan

10  
11 § The authors equally contributed to this work.

12  
13 \* Corresponding author

14 E-mail address: taikimori7@gmail.com

15  
16 Conflict of Interest: None declared.

17  
18 **Abstract**

19 It is acknowledged that exogenous nutrient addition often stimulates early-stage litter  
20 decomposition in forests and late-stage decomposition is generally suppressed by  
21 nitrogen addition, whereas the interactive effects of nutrient addition and abiotic  
22 environmental factors, such as climate, on decomposition remain unclear. The tea bag  
23 method, which was developed to provide the decomposition rate constant  $k$  of early-stage  
24 decomposition and stabilization factor  $S$  of labile materials in the late stage, is a  
25 potentially useful tool for examining the impacts of nutrient addition on both early- and  
26 late-stage litter decomposition and their interactions with climate. At a long-term (38-  
27 year) continuous fertilization experimental site (an *Abies sachalinensis* Fr. Schmidt stand)  
28 in Hokkaido, Japan, we examined whether a standard tea bag method protocol was  
29 sufficiently sensitive to reveal any impacts of nutrient addition on early- and late-stage  
30 decomposition. In addition, we tested the interactive effects of nutrient addition and  
31 climate on litter decomposition. The short incubation period of the tea bag method (ca.  
32 90 days) enabled us to obtain decomposition data from the same location at three different  
33 times in a year, i.e., early summer, midsummer, and winter, providing an opportunity to  
34 test interactive effects. We demonstrated that the decomposition rate of rooibos tea and  
35 the decomposition rate constant  $k$  of early-stage decomposition were clearly stimulated  
36 by fertilization in midsummer, but no impacts were detected in other seasons, probably

37 because the relative importance of nutrient availability was elevated in midsummer,  
38 during which decomposition rates were less constrained by temperature and moisture.  
39 The green tea decomposition rate and stabilization factor  $S$ , an index related to late-stage  
40 decomposition, were unaffected by fertilization. This was probably because the tea bag  
41 method does not take into account lignin degradation, which is considered a key factor  
42 controlling late-stage litter decomposition. Overall, the present study (i) successfully  
43 determined the interactive effects of nutrient addition and climate factors on litter  
44 decomposition by making full use of the tea bag method, and (ii) the results suggest that  
45 the tea bag method can be a suitable tool for examining the direct effects of nutrient  
46 addition and their interactions with environmental factors on early-stage litter  
47 decomposition, but not those on late-stage decomposition.

48

49 *Key words: early stage litter decomposition; fertilization; nitrogen; phosphorus; Tea Bag*  
50 *Index*

51

## 52 **Introduction**

53 Since the industrial revolution, anthropogenic nutrient inputs into ecosystems have been  
54 elevated substantially, which could have large impacts on ecosystem function (Galloway  
55 et al., 2008). Litter decomposition is an essential process that controls both nutrient  
56 recycling and carbon (C) dynamics in forest ecosystems. Litter decomposition can be  
57 divided into two stages—the early stage, when soluble compounds and non-lignified  
58 cellulose and hemicellulose are degraded, and the late stage, during which lignified  
59 tissues are degraded. It is essential to understand how nutrient loading, especially of  
60 nitrogen (N) and phosphorus (P), affects both early- and late-stage litter decomposition.

61 It is widely known that late-stage decomposition is generally inhibited by N  
62 addition (Berg, 1986; Janssens et al., 2010; Knorr, Frey, & Curtis, 2005) because of the  
63 following possible reasons, which are not necessarily mutually exclusive: (i) N addition  
64 causes the production of chemically recalcitrant materials (Berg and Matzner, 1997, but  
65 see Rinkes et al., 2016); (ii) N toxicity, high-salt conditions, or acidification caused by N  
66 addition negatively affects microbial activity; (iii) added N causes microbes to stop  
67 acquiring N from organic matter (Craine, Morrow, & Fierer, 2007); and (iv) microbial  
68 community changes can be caused by N addition (Bonner et al., 2019; Ramirez, Craine,  
69 & Fierer, 2012). Similarly, P addition may also suppress late-stage litter decomposition  
70 (DeForest, 2019; Mori et al., 2015), although these mechanisms are not well understood.  
71 Conversely, early-stage litter decomposition (or the decomposition of litter with low  
72 lignin content) is often stimulated by the additions of N (Berg & Matzner, 1997; Fog,

73 1988; Knorr et al., 2005) and P (Mori et al., 2015), probably because the nutrient  
74 limitations of decomposers are relieved by nutrient addition. Recent meta-analyses have  
75 demonstrated that the activities of enzymes that degrade cellulose and hemicellulose are  
76 stimulated by N, whereas N addition suppresses oxidative enzymes that have an important  
77 role in degrading lignin (Jian et al., 2016; Xiao, Chen, Jing, & Zhu, 2018), successfully  
78 explaining the contrasting impacts of N loading on the early- and late-stages of litter  
79 decomposition.

80 Thus, it is acknowledged that exogenous nutrient additions often stimulate early-  
81 stage litter decomposition in forests, whereas late-stage decomposition is generally  
82 suppressed by N addition. However, the interactive effects of nutrient addition and  
83 various abiotic environmental factors, especially climatic factors such as temperature and  
84 moisture, on decomposition remain unclear. For example, the relative importance of  
85 nutrient availability may be elevated under hotter and wetter conditions, during which  
86 decomposition is less restricted by temperature and moisture. If this is the case, the  
87 stimulating effects of nutrient addition on early-stage litter decomposition may be more  
88 intensive under hotter and wetter conditions. The investigation of these effects requires  
89 data sets of litter decomposition rates from fertilization studies conducted using  
90 standardized materials under different environmental conditions, because the quality of  
91 litter significantly affects the response of decomposition to added nutrients (Knorr et al.,  
92 2005), thus masking the impacts of nutrient addition and environmental factors.

93 Tea bag decomposition is a cost-effective method using standardized materials  
94 that can be employed to obtain indices related to both early- and late-stage decomposition  
95 with a single measurement after a 90-day field incubation. Using this method, the limit  
96 value (i.e., the point at which the decomposition process either continues at a very low  
97 rate or possibly stops; Berg et al., 2010) of the hydrolysable fraction of teas can be  
98 expressed as the mass-loss ratio of green tea, assuming that (i) the decay rate of the  
99 hydrolysable fraction of green tea becomes nearly zero at 90 days and (ii) the  
100 undecomposed hydrolysable fraction at 90 days is stabilized and remains undecomposed  
101 over the long term. The ratio of the undecomposed fraction to the total hydrolysable  
102 fraction is defined as the “stabilization factor  $S$ ,” which is considered to indicate long-  
103 term carbon storage (Fujii et al., 2017). On the other hand, the decomposition constant  $k$   
104 of early-stage decomposition is determined by calculating the decomposition rate of  
105 rooibos tea using an asymptotic model, assuming that the stabilization factor  $S$  of rooibos  
106 tea is the same as that of green tea (for more details, see the Materials and Methods  
107 section). This method has been proposed as an effective approach for collecting  
108 comparable globally distributed data (Keuskamp, Dingemans, Lehtinen, Sarneel, &

109 Hefting, 2013), and is used by an increasing number of researchers (Djukic et al., 2018;  
110 Fujii et al., 2017; Mueller et al., 2018; Petraglia et al., 2019; Suzuki et al., 2019).

111 The tea bag method constitutes a potentially useful tool for examining the direct  
112 effects of nutrient additions on both the early- and late-stages of litter decomposition,  
113 requiring less effort than other methods. In addition, it can also enable researchers to  
114 determine the interactions between nutrient additions and various environmental factors  
115 with respect to the decomposition of litter, owing to the well-standardized materials used  
116 in the method. In the present study, we investigated whether the standard protocol of the  
117 tea bag method was sufficiently sensitive to reveal (i) any impacts of nutrient addition on  
118 indices related to early- (i.e., decomposition constant  $k$ ) and late-stage (i.e., stabilization  
119 factor  $S$ ) decomposition and (ii) any interactive effects of nutrient addition and abiotic  
120 environmental factors on decomposition. To focus on the interactive effects of nutrient  
121 addition and climate factors, which are the most important abiotic environmental factors  
122 controlling organic matter decomposition, we tried to minimize site effects other than  
123 climate by performing decomposition experiments at the same study site but in different  
124 seasons of the year, i.e., early summer, midsummer, and winter. The short incubation term  
125 (ca. 90 days) of the protocol made this approach possible.

126 We hypothesized that early-stage decomposition rates (indicated by the mass loss  
127 ratio of rooibos tea and decomposition constant  $k$ ) are stimulated by nutrient addition,  
128 which relieves the nutrient limitation of soil microbes. On the other hand, the stabilization  
129 factor  $S$ , an index related to late-stage decomposition, as well as the mass loss ratio of  
130 green tea, should be unaffected by nutrient addition because the tea bag method and the  
131 tea bag indices do not consider lignin degradation, the most important fraction controlling  
132 late-stage decomposition and its response to N addition. We also hypothesized that the  
133 impact of nutrient addition on early-stage litter decomposition would be more remarkable  
134 in hotter and wetter climates.

135

## 136 **Materials and methods**

### 137 *Study site*

138 The present study was performed in a portion of a long-term fertilization experimental  
139 site in the experimental forest of the Hokkaido Research Center, Forestry and Forest  
140 Products Research Institute, Sapporo, Japan (42°59'N, 141°23'E) (Aizawa et al., 2012;  
141 Furusawa, Nagakura, Aizawa, & Ito, 2019). The mean annual temperature and annual  
142 precipitation at the study site in 2015, as determined using Agro-Meteorological Grid  
143 Square Data, NARO, were 8.5 °C and 1071 mm, respectively (Fig. S1). An *Abies*  
144 *sachalinensis* Fr. *Schmidt* (Sakhalin fir) stand was established at the site in 1973, with

145 four sub-plots: C1 (control 1), C2 (control 2), NP (fertilized with N and P), and NP6Y  
146 (fertilized with N and P only for the first 6 years). Fertilization with N and P was initiated  
147 in 1978, using ammonium sulfate and lime superphosphate. The average amounts of  
148 added N and P were  $114 \text{ kg N ha}^{-1} \text{ year}^{-1}$  and  $33 \text{ kg P ha}^{-1} \text{ year}^{-1}$  for the first 6 years, and  
149  $122 \text{ kg N ha}^{-1} \text{ year}^{-1}$  and  $34 \text{ kg P ha}^{-1} \text{ year}^{-1}$  over the whole experimental period (38  
150 years). Impacts of this fertilization on diameter at breast height, tree height, soil pH, and  
151 soil total C content have been reported by a previous study (Aizawa et al., 2012) (Fig. 1).

152

### 153 *Tea bag incubation*

154 Tea bag incubations were performed in early summer (91 days, from 1 June to 31 August),  
155 midsummer (90 days, from 2 July to 30 September), and winter (89 days, from 5  
156 November to 2 February). Cumulative precipitations and accumulated temperatures  
157 higher than zero during the field incubation experiments were calculated using data from  
158 Agro-Meteorological Grid Square Data, NARO (Fig. 2). Basically, we followed the  
159 protocol from Keuskamp et al. (2013). Green (EAN: 87 22,700 05552 5) and rooibos  
160 (EAN: 87 22,700 18,843 8) teabags produced by Lipton (0.25-mm mesh) were used for  
161 the experiment. We evenly divided each sub-plot into four areas, in each of which two  
162 replicate pairs of tea bags (green and rooibos tea bags) were buried in the soil at 8-cm  
163 depth. Tea bags were retrieved approximately 90 days later. The bags were oven dried at  
164  $70 \text{ }^\circ\text{C}$  for 48 h, and dry weights were determined.

165

### 166 *Calculation of tea bag indices*

167 Following Keuskamp et al. (2013), we calculated the tea bag indices, i.e., the stabilization  
168 factor  $S$  and decomposition constant  $k$ . The stabilization factor  $S$  was calculated as the  
169 relative amount of labile fractions of green tea that were stabilized and transformed to  
170 recalcitrant fractions during decomposition (Keuskamp et al., 2013).  $S$  can be calculated  
171 as follows, assuming that (i) the decomposition of the labile fractions of green tea was  
172 complete during the incubation period and (ii) the remaining fractions were transformed  
173 into recalcitrant fractions:

$$174 \quad S = 1 - a_g / H_g \quad (1)$$

175 where  $a_g$  is the decomposed fraction and  $H_g$  (0.842; Keuskamp et al. 2013) is the  
176 hydrolysable fraction of green tea. The decomposed fraction of green tea was determined  
177 after incubating green tea, as follows:

$$178 \quad a_g = 1 - W_g(t) / W_g(0) \quad (2)$$

179 where  $W_g(t)$  is the weight of the green tea after incubation time  $t$  and  $W_g(0)$  is the weight  
180 of the green tea before incubation.

181 The decomposition process of organic matter, including both easily degradable and  
182 recalcitrant compounds, can be approximated as follows (Wieder & Lang, 1982):

$$183 \quad W(t)/W(0) = ae^{-k_1t} + (1-a)e^{-k_2t} \quad (3)$$

184 where  $W(t)$  is the weight of the substrate after incubation time  $t$ ,  $W(0)$  is the weight of the  
185 substrate before incubation,  $a$  and  $(1-a)$  are the labile and recalcitrant fractions of the  
186 litter, respectively, and  $k_1$  and  $k_2$  are the decomposition rate constants of the labile and  
187 recalcitrant fractions, respectively. Because the weight loss of the recalcitrant fraction is  
188 generally negligible during short-term field incubations, Eq. (3) can be reduced as follows,  
189 assuming  $k_2 = 0$ :

$$190 \quad W(t) / W(0) = ae^{-kt} + (1-a) \quad (4)$$

191 For the tea bag indices, the decomposition rate of rooibos tea is used to calculate  
192 decomposition constant  $k$ . The decomposable fraction of rooibos tea ( $a_r$ ) can be calculated  
193 using the value of  $S$ , assuming that the same ratio of labile fractions is stabilized in rooibos  
194 tea as in green tea:

$$195 \quad a_r = H_r (1 - S) \quad (5)$$

196 where  $H_r$  is the hydrolysable fraction of rooibos tea (0.552; Keuskamp et al. 2013). The  
197 decomposition constant  $k$  is calculated by applying  $W_r(0)$ ,  $W_r(t)$ ,  $t$ , and  $a_r$  to the  
198 exponential decay function given in Eq. (4) as follows:

$$199 \quad k = \ln(a_r / (W_r(t) / W_r(0) - (1 - a_r))) / t \quad (6)$$

200 where  $W_r(t)$  is the weight of the rooibos tea after incubation time  $t$  and  $W_r(0)$  is the weight  
201 of the rooibos tea before incubation.

202

### 203 *Statistics*

204 Two-way ANOVA followed by Tukey's *post hoc* tests were used to determine the  
205 significance of the impacts of fertilization and season, assuming normal distribution of  
206 the data. If any interaction was significant, simple main effect analyses (Tukey's *ad-hoc*  
207 tests) were performed to detect the factor(s) causing the interaction.

208 The correlation between decomposition constant  $k$  and stabilization factor  $S$  was  
209 tested using Pearson's correlation test. All eight (six for winter) samples were used in the  
210 analysis. The correlation analysis was carefully done; we compared the results of the  
211 correlation analysis with correlations of simulated  $k$  and  $S$  that were calculated from  
212 random data generated from real data obtained from the field experiment. This  
213 comparison was needed because  $S$ , the function of green tea decomposition rate, and  $k$ ,  
214 the function of the decomposition rates of both green and rooibos teas, could be correlated  
215 even if the data for tea bag decomposition rates were randomly distributed. The  
216 simulation data were generated using the average and standard deviation of the field data,

217 assuming a standard distribution. Data obtained from midsummer were used. Each  
218 generated simulation datum of the ratio of green tea mass remaining was paired up with  
219 a datum for rooibos tea. The generated pairs were not correlated with each other (see Fig.  
220 S3). Using this simulation data, the decomposition constant  $k$  and stabilization factor  $S$   
221 were calculated. All statistical analyses were performed using R software (R Core Team,  
222 2019).

223

## 224 **Results**

225 The decomposition rates of the green and rooibos teas were within the range of data taken  
226 from other study sites in Japan (Fig. S2), although the decomposition rates of both green  
227 and rooibos teas in winter might have been slightly elevated at our study site (Fig. S2a,  
228 b).

229 Green tea decomposition was significantly affected by the season but not by  
230 fertilization (two-way ANOVA, Fig. 3a). Tukey's multi-comparison tests showed that the  
231 decomposition of green tea was quicker in midsummer than in early summer or winter.  
232 Season and fertilization influenced the decomposition of rooibos tea with a significant  
233 interaction (two-way ANOVA, Fig. 3b). The simple main effect analysis suggested that  
234 (i) the effect of fertilization on rooibos tea decomposition was significant only in  
235 midsummer and (ii) decomposition rates were slower in winter compared with early and  
236 mid-summer. Although the incubation periods were slightly different among seasons (91,  
237 90, and 89 days in early summer, midsummer, and winter, respectively), statistical  
238 analyses using the normalized data (mass loss ratio per day) demonstrated that the results  
239 were not affected by the differences in incubation periods.

240 The impacts of fertilization and season on stabilization factor  $S$  were the same as  
241 those on green tea decomposition (Fig. 4a), because  $S$  was calculated using the mass loss  
242 ratio of green tea multiplied by a constant factor (see Eq. 1 and 2). Meanwhile, the impacts  
243 of fertilization and season on decomposition constant  $k$  are affected by the decomposition  
244 rates of both green and rooibos teas (see Eq. 4 and 5). The decomposition constant  $k$  was  
245 affected by an interaction between fertilization and season (two-way ANOVA, Fig. 4b).  
246 A simple main effect analysis suggested that the effects of fertilization on rooibos tea  
247 decomposition were significant only in midsummer.

248 We found significant positive correlations between  $k$  and  $S$  in all four treatments  
249 in midsummer (Fig. 5b) and in the NP plot in winter (Fig. 5c). The simulation also  
250 demonstrated a similar pattern—i.e., a significant positive correlation between simulated  
251  $k$  and  $S$  (Fig. 5d).

252

253 **Discussion**

254 *Impacts of nutrient addition on early-stage litter decomposition and interactions with*  
255 *climate*

256 As we hypothesized, nutrient addition significantly stimulated early-stage litter  
257 decomposition in midsummer, as indicated by the elevated mass loss ratio of rooibos tea  
258 and decomposition constant  $k$ . This result is consistent with earlier studies, which reported  
259 that litters with higher nutrient contents, or those amended with nutrients, had higher  
260 decomposition rates (Berg & Matzner, 1997; Carreiro, Sinsabaugh, Rebert, & Parkhurst,  
261 2000; Fog, 1988; Mori et al., 2015), probably because microbial nutrient shortages were  
262 relieved. The fact that rooibos tea decomposition was stimulated only in midsummer but  
263 not in early summer or winter (Fig. 2b) indicated that the tea bag method successfully  
264 detected the interactive effects of nutrient addition and climate on litter decomposition.  
265 The relative importance of nutrient availability was probably elevated in midsummer,  
266 during which decomposition rates were less restricted by temperature than during winter  
267 or by higher moisture than in early summer (Fig. 2). This suggests that the impacts of  
268 fertilization may be stronger in hotter and wetter climate zones, such as tropical rain  
269 forests. Thus, we successfully demonstrated that the tea bag method is a suitable tool for  
270 examining the direct effects of nutrient addition and their interactions with environmental  
271 factors on early-stage litter decomposition. Larger amounts of data from fertilization  
272 studies using tea bag methods conducted at various sites would enable the clarification of  
273 the interactive effects of fertilization and environmental factors other than climate, such  
274 as soil and background vegetation types.

275

276 *Impacts of nutrient addition on late-stage litter decomposition*

277 As we hypothesized, green tea decomposition rates and the stabilization factor  $S$  were not  
278 influenced by experimental nutrient addition. The lack of response of decomposition rates  
279 to nutrient addition does not necessarily indicate a methodological unsuitability, but in  
280 addition to observations from the field experiment, we have a theoretical basis for  
281 assuming that the tea bag method has unsuitable characteristics for determining the  
282 impacts of nutrient loading on late-stage litter decomposition. The tea bag method focuses  
283 on the hydrolysable fraction, and it is assumed that lignin degradation is negligible during  
284 the 90-day incubation of the teas (Keuskamp et al., 2013). As a result, lignin degradation  
285 is not considered when determining stabilization factor  $S$ . Thus, the response of lignin  
286 decomposition to nutrient addition is undetectable using the tea bag method. Because it  
287 is well acknowledged that lignin, or the unhydrolysable fraction of litter, is a key factor  
288 in controlling late-stage litter decomposition, and N addition suppresses the degradation



289 of lignin (Jian et al., 2016; Rinke et al., 2016), the tea bag method would be unsuitable  
290 for assessing the impacts of nutrient addition on long-term C storage, although this  
291 method may be a useful tool for estimating C stability.

292 Our study demonstrated that the decomposition rates of green tea were  
293 significantly influenced by season, with quicker decomposition in midsummer than in  
294 other seasons (Fig. 3a). Accordingly, the stabilization factor  $S$  was smaller in midsummer  
295 than in other seasons (Fig. 4a). This was attributed to lower temperatures in winter (Fig.  
296 2b) and smaller amounts of precipitation in early summer (Fig. 2a) compared with  
297 midsummer. According to the tea bag method, this result can be interpreted as larger  
298 amounts of labile fractions being transformed into recalcitrant fractions (Keuskamp et al.,  
299 2013) in early summer and winter compared to midsummer. However, it is possible that  
300 the decomposition of labile fractions of green tea was retarded by less favorable  
301 conditions for decomposers, and thus did not reach its limit value in early summer and  
302 winter. The results of several previous studies may support this, as higher decomposition  
303 rates of green tea were reported on the 150<sup>th</sup> day compared to the 90<sup>th</sup> day (Wang et al.,  
304 2019) as well as on the 136<sup>th</sup> day compared to the 89<sup>th</sup> day (Seelen et al., 2019), indicating  
305 that green tea decomposition did not reach its limit values at 90 days. If this was the case,  
306  $S$  was overestimated in winter and early summer (Fig. S4), and hence, the decomposition  
307 rate  $k$  was also overestimated (Fig. S4). This idea should be tested in future studies.

308

### 309 *Raw decomposition data vs $k$ for evaluating the impacts of nutrient addition*

310 Although the direct impacts of nutrient addition and its interaction with climate factors  
311 were successfully detected using both raw decomposition data and the decomposition rate  
312 constant  $k$ , we have several reasons to consider that the raw decomposition data from the  
313 tea bag experiment may be better for evaluating the impacts of nutrient addition on litter  
314 decomposition. As discussed earlier,  $S$  might have been overestimated because the  
315 decomposition of the hydrolysable fraction might not have reached its limit value, in  
316 which case,  $k$  would also be overestimated (Fig. S4). In addition, a premise for calculating  
317  $k$ , that the stabilization factor is the same for both green and rooibos teas, was not verified,  
318 which also risks the over- or under-estimation of  $k$ . Furthermore, plotting the relationship  
319 between  $k$  and  $S$ , as several previous studies have reported (Becker & Kuzyakov, 2018;  
320 Keuskamp et al., 2013; Macdonald et al., 2018; Seelen et al., 2019), may be misleading.  
321 In the present study, we found significant positive correlations between  $k$  and  $S$  in all four  
322 treatments in midsummer and in the NP plot in winter (Fig. 5bc). There is a risk of  
323 misinterpreting positive correlations according to the definitions of the tea bag indices,  
324 because a positive correlation was also obtained using randomly generated data (Fig. 5d).

325 Although these concerns regarding over- and under-estimation or misinterpretation are  
326 not always valid, it may be true that calculating  $k$  values to evaluate the impacts of nutrient  
327 addition on litter decomposition rates needs great care for the results to be adequately  
328 interpreted. We suggest that raw rooibos tea decomposition rates may be a better indicator  
329 when assessing the impacts of nutrient addition on litter decomposition.

330

### 331 **Conclusion**

332 Using the tea bag method, we successfully demonstrated that nutrient addition and  
333 climate factors have an interactive effect on litter decomposition. We also suggest that the  
334 tea bag method may be a suitable tool for examining the direct effects of nutrient addition  
335 and its interactions with environmental factors on early-stage organic matter  
336 decomposition, but not those on late-stage decomposition.

337

### 338 **Acknowledgement**

339 This research was funded by JSPS KAKENHI Grant Number JP19K15879.

340

341

342

343

344

345

346

347 **References**

- 348 Aizawa, S., Ito, E., Hashimoto, T., Sakata, T., Sakai, H., Tanaka, N., ... Sanada, M.  
349 (2012). Influence of fertilization on growth of 37-years-old plantations of *Abies*  
350 *sachalinensis*, *Picea jezoensis*, *Picea glehnii* and *Betula maximowicziana* (in  
351 Japanese). *Boreal For Res*, 60, 93–99.
- 352 Becker, J. N., & Kuzyakov, Y. (2018). Teatime on Mount Kilimanjaro: Assessing climate  
353 and land-use effects on litter decomposition and stabilization using the Tea Bag  
354 Index. *Land Degradation and Development*, 29(8), 2321–2329.  
355 doi:10.1002/ldr.2982
- 356 Berg, B., Davey, M. P., de Marco, A., Emmett, B., Faituri, M., Hobbie, S. E., ... Virzo  
357 De Santo, A. (2010). Factors influencing limit values for pine needle litter  
358 decomposition: A synthesis for boreal and temperate pine forest systems.  
359 *Biogeochemistry*, 100(1), 57–73. doi:10.1007/s10533-009-9404-y
- 360 Berg, B., & Matzner, E. (1997). Effect of N deposition on decomposition of plant litter  
361 and soil organic matter in forest systems. *Environ. Rev.*, 5, Environ. Rev. 5: 1–25  
362 (1997). doi:10.1139/a96-017
- 363 Berg, Björn. (1986). Nutrient release from litter and humus in coniferous forest soils: a  
364 mini review. *Scandinavian Journal of Forest Research*, 1(June), 359–369.  
365 doi:10.1080/02827588609382428
- 366 Bonner, M. T., Castro, D., Schneider, A. N., Sundström, G., Hurry, V., Street, N. R., &  
367 Näsholm, T. (2019). Why does nitrogen addition to forest soils inhibit  
368 decomposition? *Soil Biology and Biochemistry*, 137(March), 107570.  
369 doi:10.1016/j.soilbio.2019.107570
- 370 Carreiro, M. M., Sinsabaugh, R. L., Repert, D. A., & Parkhurst, D. F. (2000). Microbial  
371 Enzyme Shifts Explain Litter Decay Responses To Enzyme, Microbial Explain,  
372 Shifts Decay, Litter To, Responses Deposition, Simulated Nitrogen. *Ecology*, 81(9),  
373 2359–2365.
- 374 Craine, J. M., Morrow, C., & Fierer, N. (2007). Microbial nitrogen limitation increases  
375 decomposition. *Ecology*, 88(8), 2105–2113. doi:10.1890/06-1847.1
- 376 DeForest, J. L. (2019). Chronic phosphorus enrichment and elevated pH suppresses  
377 *Quercus* spp. leaf litter decomposition in a temperate forest. *Soil Biology and*  
378 *Biochemistry*, 135(January), 206–212. doi:10.1016/j.soilbio.2019.05.005
- 379 Djukic, I., Kepfer-rojas, S., Kappel, I., Steenberg, K., Caliman, A., Paquette, A., ...  
380 Schaub, M. (2018). Early stage litter decomposition across biomes, 629, 1369–1394.  
381 doi:10.1016/j.scitotenv.2018.01.012
- 382 Fog, K. (1988). The effect of added nitrogen on the rate of decomposition of organic

- 383 matter. *Biological Reviews*, 63(3), 433–462. doi:10.1111/j.1469-  
384 185X.1988.tb00725.x
- 385 Fujii, S., Mori, A. S., Koide, D., Makoto, K., Matsuoka, S., Osono, T., & Isbell, F. (2017).  
386 Disentangling relationships between plant diversity and decomposition processes  
387 under forest restoration. *Journal of Applied Ecology*, 54(1), 80–90.  
388 doi:10.1111/1365-2664.12733
- 389 Furusawa, H., Nagakura, J., Aizawa, S., & Ito, E. (2019). Effects of repeated fertilization  
390 and liming on soil microbial biomass in *Betula maximowicziana* Regel and *Abies*  
391 *sachalinensis* Fr. Schmidt stands in Japan. *Landscape and Ecological Engineering*,  
392 15(1), 101–111. doi:10.1007/s11355-018-0366-x
- 393 Galloway, J. N., Townsend, A. R., Erisman, J. W., Bekunda, M., Cai, Z., Freney, J. R.,  
394 ... Sutton, M. a. (2008). Transformation of the Nitrogen Cycle: Recent Trends,  
395 Questions, and Potential Solutions. *Science*, 320(5878), 889–892.  
396 doi:10.1126/science.1136674
- 397 Janssens, I., Dieleman, W., Luysaert, S., Subke, J., Reichstein, M., Ceulemans, R., ...  
398 Law, B. (2010). Reduction of forest soil respiration in response to nitrogen  
399 deposition. *Nature Geoscience*, 3(5), 315–322. doi:10.1038/ngeo844
- 400 Jian, S., Li, J., Chen, J., Wang, G., Mayes, M. A., Dzantor, K. E., ... Luo, Y. (2016). Soil  
401 extracellular enzyme activities, soil carbon and nitrogen storage under nitrogen  
402 fertilization: A meta-analysis. *Soil Biology and Biochemistry*, 101, 32–43.  
403 doi:10.1016/j.soilbio.2016.07.003
- 404 Keuskamp, J. A., Dingemans, B. J. J., Lehtinen, T., Sarneel, J. M., & Hefting, M. M.  
405 (2013). Tea Bag Index: A novel approach to collect uniform decomposition data  
406 across ecosystems. *Methods in Ecology and Evolution*, 4(11), 1070–1075.  
407 doi:10.1111/2041-210X.12097
- 408 Knorr, M., Frey, S., & Curtis, P. (2005). Nitrogen additions and litter decomposition: A  
409 meta analysis. *Ecology*, 86(12), 3252–3257. doi:10.1890/05-0150
- 410 Macdonald, E., Brummell, M. E., Bieniada, A., Elliott, J., Engering, A., Gauthier, T.-L.,  
411 ... Strack, M. (2018). Using the Tea Bag Index to characterize decomposition rates  
412 in restored peatlands. *Boreal Environment Research*, 2469(August), 221–235.
- 413 Mori, T., Ishizuka, S., Konda, R., Wicaksono, A., Heriyanto, J., & Hardjono, A. (2015).  
414 Phosphorus addition reduced microbial respiration during the decomposi- tion of  
415 *Acacia mangium* litter in South Sumatra , Indonesia. *Tropics*, 24(3), 113–118.
- 416 Mueller, P., Schile-Beers, L. M., Mozdzer, T. J., Chmura, G. L., Dinter, T., Kuzyakov,  
417 Y., ... Nolte, S. (2018). Global-change effects on early-stage decomposition  
418 processes in tidal wetlands-implications from a global survey using standardized

- 419 litter. *Biogeosciences*, 15(10), 3189–3202. doi:10.5194/bg-15-3189-2018
- 420 Petraglia, A., Cacciatori, C., Chelli, S., Fenu, G., Calderisi, G., Gargano, D., ...  
421 Carbognani, M. (2019). Litter decomposition: effects of temperature driven by soil  
422 moisture and vegetation type. *Plant and Soil*, 435(1–2), 187–200.  
423 doi:10.1007/s11104-018-3889-x
- 424 R Core Team. (2019). R: A language and environment for statistical computing.  
425 Statistical, R Foundation for Computing, Vienna, Austria. URL [https://www.R-](https://www.R-project.org/)  
426 [project.org/](https://www.R-project.org/).
- 427 Ramirez, K. S., Craine, J. M., & Fierer, N. (2012). Consistent effects of nitrogen  
428 amendments on soil microbial communities and processes across biomes. *Global*  
429 *Change Biology*, 18(6), 1918–1927. doi:10.1111/j.1365-2486.2012.02639.x
- 430 Rinkes, Z. L., Bertrand, I., Amin, B. A. Z., Grandy, A. S., Wickings, K., & Weintraub,  
431 M. N. (2016). Nitrogen alters microbial enzyme dynamics but not lignin chemistry  
432 during maize decomposition. *Biogeochemistry*, 128(1–2), 171–186.  
433 doi:10.1007/s10533-016-0201-0
- 434 Seelen, L. M. S., Flaim, G., Keuskamp, J., Teurlincx, S., Arias Font, R., Tolunay, D., ...  
435 de Senerpont Domis, L. N. (2019). An affordable and reliable assessment of aquatic  
436 decomposition: Tailoring the Tea Bag Index to surface waters. *Water Research*, 151,  
437 31–43. doi:10.1016/j.watres.2018.11.081
- 438 Suzuki, S. N., Ataka, M., Djukic, I., Enoki, T., Fukuzawa, K., Hirota, M., ... Watanabe,  
439 K. (2019). Harmonized data on early stage litter decomposition using tea material  
440 across Japan. *Ecological Research*, 34(5), 575–576. doi:10.1111/1440-1703.12032
- 441 Wang, B., Blondeel, H., Baeten, L., Djukic, I., De Lombaerde, E., & Verheyen, K. (2019).  
442 Direct and understorey-mediated indirect effects of human-induced environmental  
443 changes on litter decomposition in temperate forest. *Soil Biology and Biochemistry*,  
444 138(September 2018), 107579. doi:10.1016/j.soilbio.2019.107579
- 445 Wieder, R., & Lang, G. (1982). A critique of the analytical methods used in examining  
446 decomposition data obtained from litter bags. *Ecology*, 63(6), 1636–1642.
- 447 Xiao, W., Chen, X., Jing, X., & Zhu, B. (2018). A meta-analysis of soil extracellular  
448 enzyme activities in response to global change. *Soil Biology and Biochemistry*,  
449 123(May), 21–32. doi:10.1016/j.soilbio.2018.05.001
- 450
- 451
- 452
- 453
- 454

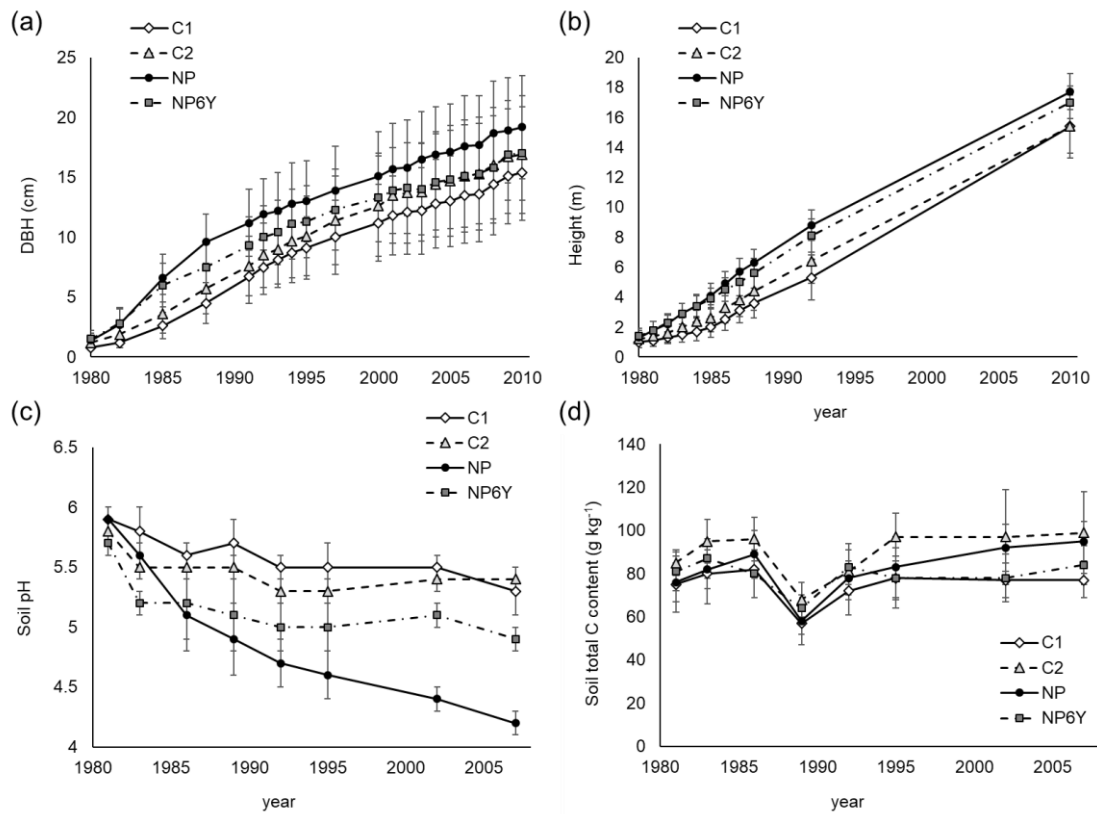

**Fig. 1.** Changes in (a) diameter at breast height (DBH), (b) tree height, (c) soil pH, and (d) soil total C content after N and P fertilization at the study sites. Data were taken from Aizawa et al. (2012). Error bars indicate standard deviations. C1, control 1; C2, control 2; NP, fertilized with N and P; NP6Y, fertilized with N and P only for the first 6 years.

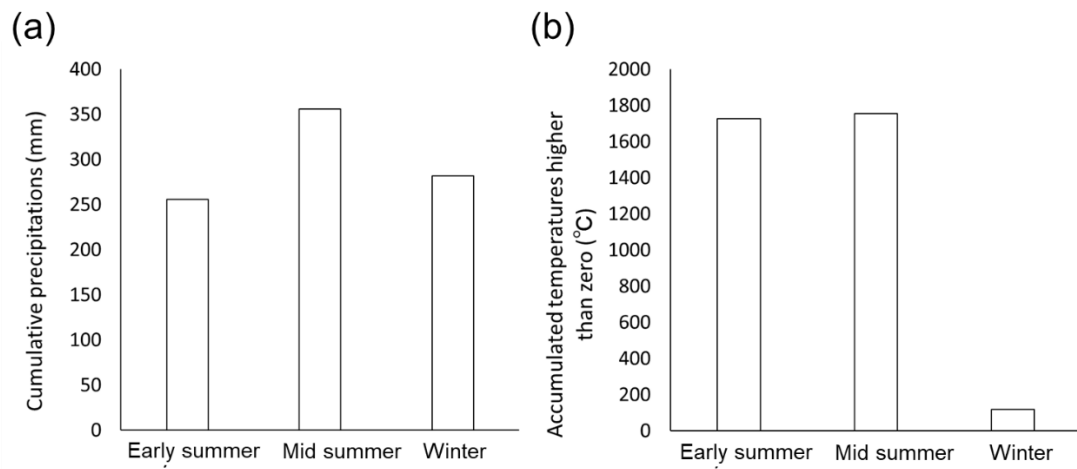

**Fig. 2.** Climate data during the experiment. (a) Cumulative precipitation and (b) accumulated temperatures higher than zero during the field incubation experiments were calculated using data from Agro-Meteorological Grid Square Data, NARO.

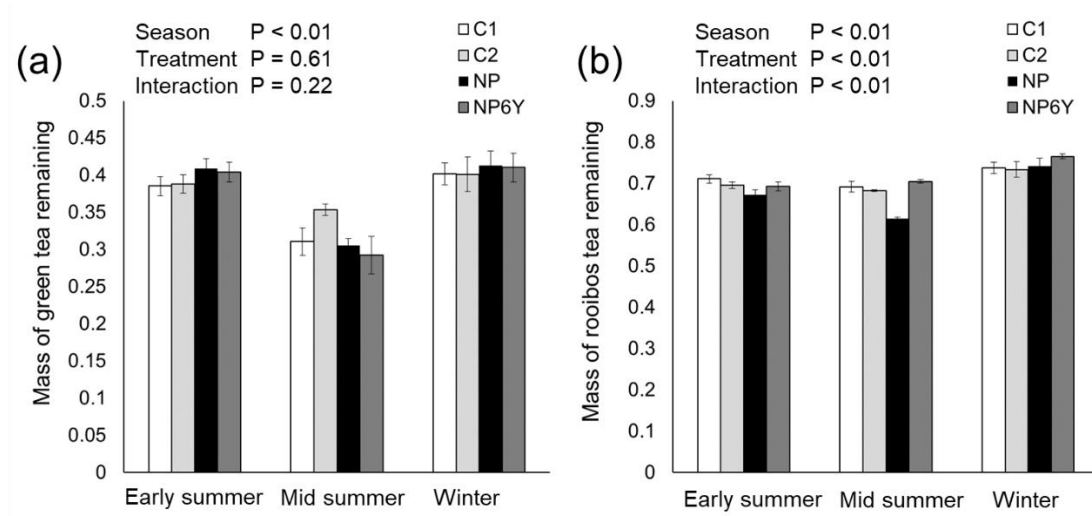

**Fig. 3.** Effects of season and fertilization on the mass of (a) green tea and (b) rooibos tea remaining after incubation. Each error bar indicates the standard error of four replicates.



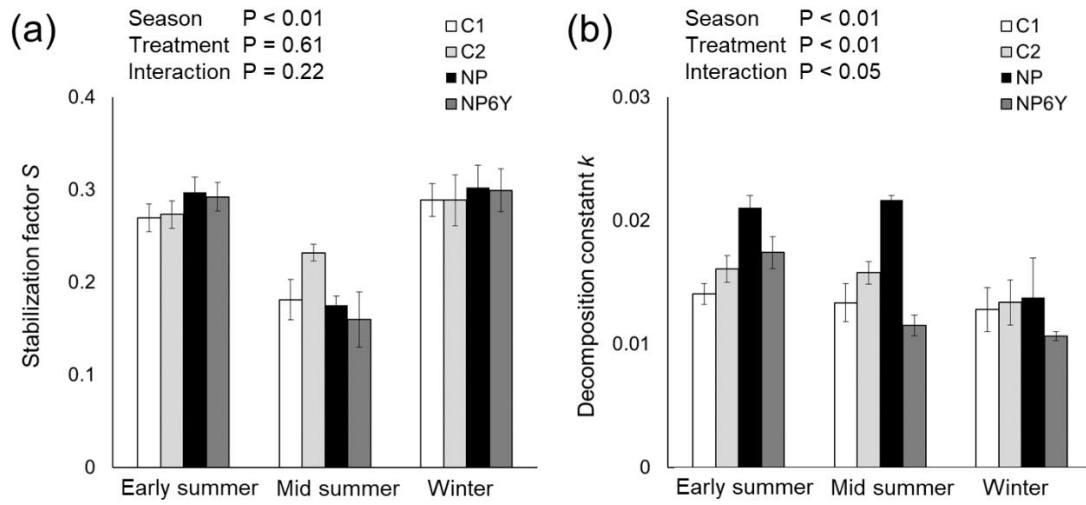

**Fig. 4.** Effects of season and fertilization on (a) stabilization factor  $S$  and (b) decomposition constant  $k$ . Each error bar indicates the standard error of four replicates.

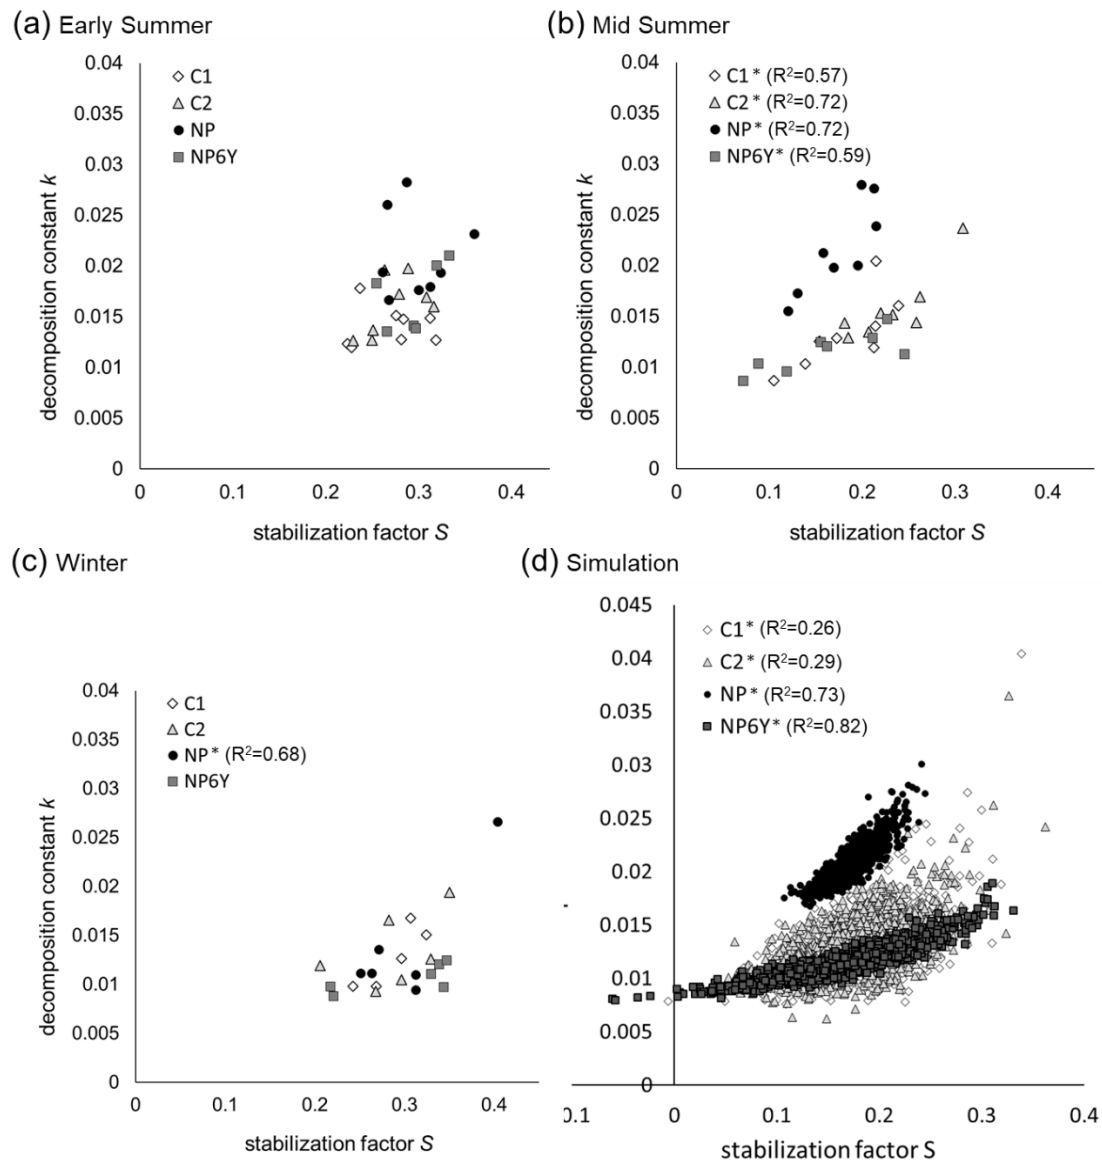

**Fig. 5.** Relationships between decomposition constant  $k$  and stabilization factor  $S$  in (a) early summer, (b) midsummer, and (c) winter and (d) using simulated data. Asterisks (\*) indicate statistically significant correlations ( $P < 0.05$ , Pearson's correlation). Simulation data ( $n = 1000$ ) of ratios of green tea and rooibos tea mass remaining were generated using averages and standard deviations of field data obtained in late summer, assuming a standard distribution. Each datum of the ratio of green tea mass remaining was paired with a datum of rooibos tea. We confirmed that the generated pairs did not exhibit a correlation (see Fig. S2). Using the data, decomposition constant  $k$  and stabilization factor  $S$  were calculated. The generated  $k$  and  $S$  values exhibited significant positive correlations (d), indicating that positive correlations can be automatically obtained.
